# Supplementary material for: Defective silicotungstic acid-loaded magnetic floral N-doped carbon microspheres for ultra-fast oxidative desulfurization of high sulfur liquid fuels
Source: Royal Society of Chemistry journal article supplement (doi:10.1039/d3dt03028h), 2023-01-01
Supplement: d3dt03028h1.pdf [file d3dt03028h1.pdf]

Electronic Supplementary Material (ESI) for Dalton Transactions.  
This journal is © The Royal Society of Chemistry 2023

### *Supporting Information*

## **Defective Silicotungstic acid-loaded magnetic floral N-doped carbon microspheres for ultra-fast oxidative desulfurization of high sulfur liquid fuels**

Yefeng Liu <sup>a,b\*</sup>, Xiaojie Yin <sup>a</sup>, Chuan Li <sup>a</sup>, Zhong Xie <sup>a</sup>, Fuyan Zhao <sup>a</sup>, Jing Li <sup>a</sup>, Jinpei Hei <sup>a</sup>, Yang Han <sup>a</sup>, nannan Wang <sup>a\*</sup>, Peng Zuo <sup>a,\*</sup>

a. Engineering Technology Research Center of Preparation and Application of Industrial Ceramics of Anhui Province, School of Chemistry and Material Engineering, Chaohu University, 1 Bantang Road, Chaohu, P. R. China, 238000

b. Engineering Research Center of High-frequency Soft Magnetic Materials and Ceramic Powder Materials of Anhui Province, Chaohu University, Chaohu 238000, P. R. China, 238000.

Corresponding author e-mail: lyf@chu.edu.cn (Yefeng Liu); nnw1990@126.com (nannan Wang); zp@chu.edu.cn

(Peng Zuo)

### **1. Materials**

Silicotungstic acid ( $\text{H}_4\text{SiW}_{12}\text{O}_{40} \cdot x\text{H}_2\text{O}$ , abbreviated as  $\text{SiW}_{12}$ ),  $\text{H}_3\text{PW}_{12}\text{O}_{40} \cdot x\text{H}_2\text{O}$  (abbreviation for  $\text{PW}_{12}$ ) and Phosphomolybdic acid ( $\text{H}_3\text{PMo}_{12}\text{O}_{40} \cdot x\text{H}_2\text{O}$ , abbreviated as  $\text{PMo}_{12}$ ) were purchased from Shanghai Macklin Biochemical Co., Ltd. (Jiangsu, China);  $\text{Fe}_3\text{O}_4$  nanoparticle particles (20 nm) and

dopamine hydrochloride (DA) were obtained from Shanghai Macklin Biochemical Co., Ltd. (Jiangsu, China); tris (hydroxymethyl) aminomethane ( $C_4H_{11}NO_3$ , Tris) was obtained from Shanghai Aladdin Bio-Chem Technology Co., Ltd. (Jiangsu, China); Dibenzothiophene (DBT), benzothiophene (BT), and 4,6-dimethyldibenzothiophene (4,6-DMDBT) were purchased from Aladdin Bio-Chem Technology Co., Ltd. (Jiangsu, China); N-octane and acetonitrile were obtained from Tianjin Damao Chemical Reagent Factory (Tianjin, China); other drugs and reagents are commercially available analytically pure.

## 2. Characterization

Fourier transform infrared (FT-IR) spectra were carried out on a L1600300 Spectrum Two LITe infrared spectrometer (UK) using the KBr pellet approach. Ultraviolet-Visible spectra of the samples were obtained on a 2802 UV/Vis instrument (Youniko, Shanghai). X-ray photoelectron spectroscopy (XPS) was measured on a Thermo Fisher Scientific Escalab 250Xi X-ray photoelectron Spectrometer (American) using Al K $\alpha$  radiation and the C1s peak at 284.8 eV as internal standard. The X-ray diffraction (XRD) measurements of all samples were collected with Bruker D8 Advance X-ray powder diffractometer (Germany) using a Cu K $\alpha$  source to determine the chemical composition and crystalline structural properties of the samples. Scanning electronic microscopy (SEM) was determined with a Hitachi S4800 / FEI NANOSEM 450 microscope (USA). Energy-dispersive X-ray spectroscopy (EDX) analytical data were acquired on EDAX Apollo XT spectrometer (USA). Thermogravimetry analyser (TG) was conducted by a NETZSCH STA 449 F3 analyzer (Germany) in air condition from room temperature to 900 °C, with a change of 10 °C min<sup>-1</sup>. The activate radicals were recorded from by EPR (MiniSpcope MS 5000, Magnettech, Germany) with 5,5-dimethyl-1-pyrrolidine-N-oxide (DMPO) as electron capturing reagent. Tungsten content was tested by inductively-coupled plasma optical

emission spectrometry (ICP-OES, Agilent 5110, USA). The H<sub>2</sub> temperature-programmed reduction (H<sub>2</sub>-TPR, MFTP3060, China) was performed with a heating rate of 10 °C/min in a 5 % H<sub>2</sub>/Ar flow (50 cm<sup>3</sup>/min). Prior to monitoring of the TPR profiles, 100 mg of the samples were placed in a quartz reactor and heated at 200 °C in an argon flow for 60 min. High performance liquid chromatograph (HPLC, LC98-I, Beijing Wenfen Analysis Instrument Technology Development Co., Ltd) was used to confirm the ODS reaction product.

### 3. The test condition of HPLC for ODS reaction

C18 reversed-phase column (200 mm×4.6 mm×5 μm ID), column temperature of 30 °C, test wavelength of 254 nm. The mobile phase was methanol/H<sub>2</sub>O (90/10, V/V) with flow rate of 1.0 mL·min<sup>-1</sup>.

### 4. Kinetic studies of ODS, the apparent activation energy and TOF

The value of kinetic constant (*k*) given in Fig. 7 b can be obtained by the following equation:

$$\ln \frac{C_0}{C_t} = kt \quad (1)$$

where *k* represents the rate constant, *t* is the reaction time, *C*<sub>0</sub> is the initial sulfur content of the model oil, and *C*<sub>*t*</sub> is the sulfur content at time *t*.

The plot of  $\ln k$  against  $1/T$  is shown in Fig. 7 c according to the Arrhenius equation (2).

$$\ln k = -\frac{E_a}{RT} + \ln A \quad (2)$$

Based on the linear correlation between  $-\ln k$  and  $1/T$  displayed in Fig. 7 c, the obtained linear equation is  $y=4665.36x-12.550$ , the estimated value of *E*<sub>*a*</sub> is 38.79 kJ/mol.

where *E*<sub>*a*</sub> is the apparent activation energy, kJ / mol; *R* is the molar gas constant, J / (mol·K); *T* is the thermodynamic temperature, K; *A* is the pre-exponential factor; and *k* is the reaction rate constant, min<sup>-1</sup>.

$$\text{TOF} = \frac{\text{mole number of converted DBT}}{\text{mole of active species content in catalyst} \times \text{reaction time (h)}} \quad (3)$$

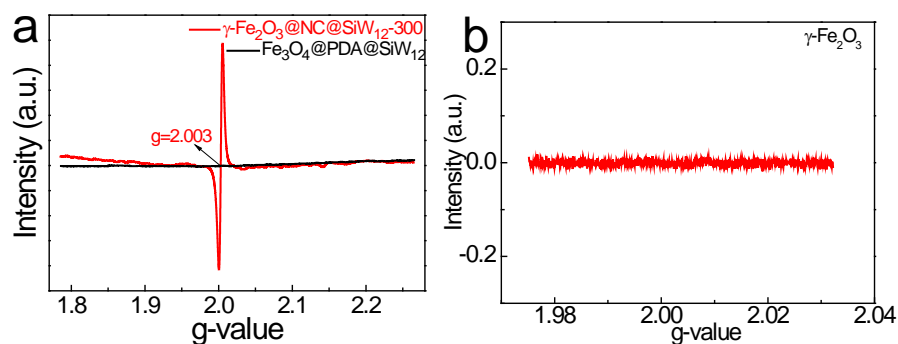

Fig. S1 EPR spectra of (a)  $\gamma\text{-Fe}_2\text{O}_3\text{@NC@SiW}_{12}\text{-300}$  and  $\text{Fe}_3\text{O}_4\text{@PDA@SiW}_{12}$  and (b)  $\gamma\text{-Fe}_2\text{O}_3$

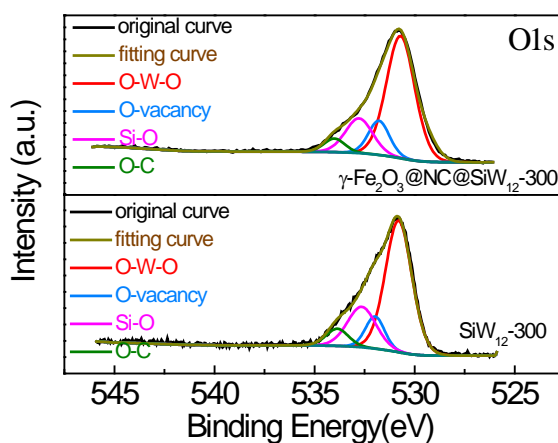

Fig. S2 XPS spectra of O1s of  $\gamma\text{-Fe}_2\text{O}_3\text{@NC@SiW}_{12}\text{-300}$  and  $\text{SiW}_{12}\text{-300}$

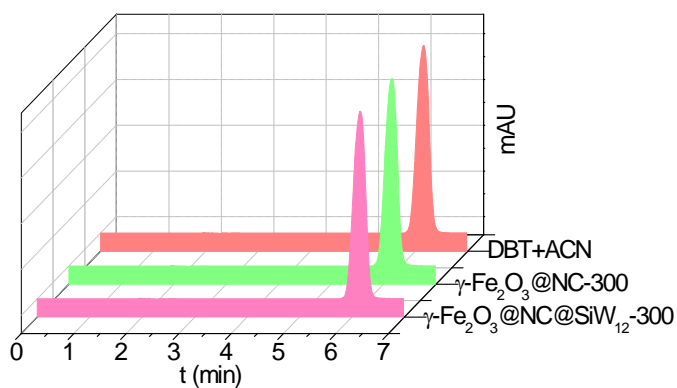

Fig. S3 Model oils containing DBT+ACN system added with  $\gamma\text{-Fe}_2\text{O}_3\text{@NC-300}$  and  $\gamma\text{-Fe}_2\text{O}_3\text{@NC@SiW}_{12}\text{-300}$ ,

respectively.

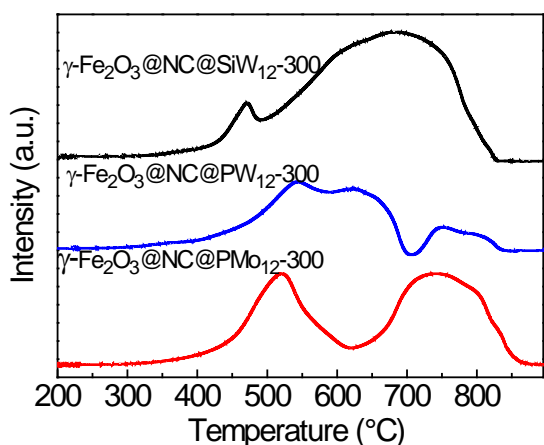

Fig. S4 H<sub>2</sub>-TPR spectra of  $\gamma$ -Fe<sub>2</sub>O<sub>3</sub>@NC@SiW<sub>12</sub>-300,  $\gamma$ -Fe<sub>2</sub>O<sub>3</sub>@NC@PW<sub>12</sub>-300 and  $\gamma$ -Fe<sub>2</sub>O<sub>3</sub>@NC@PMo<sub>12</sub>-

300.

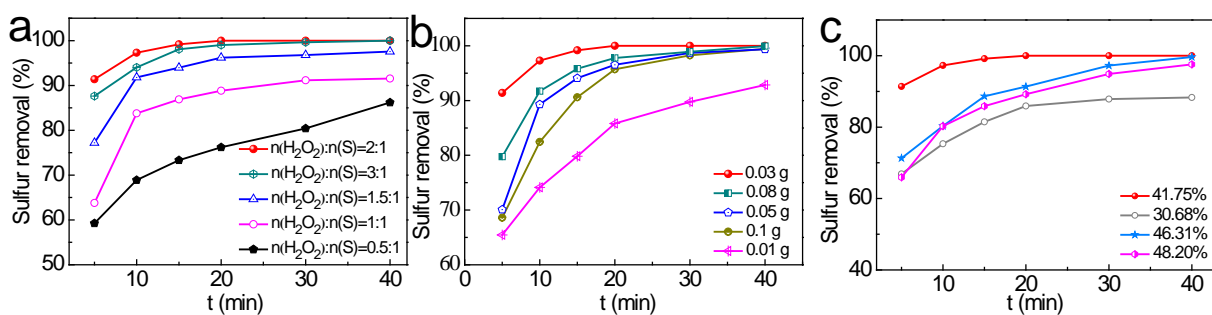

Fig. S5 (a) Effects of H<sub>2</sub>O<sub>2</sub> dosage on the sulfur removal rate (0.03 g catalysts; T = 60 °C); (b) Effects of catalyst dosage on the sulfur removal rate ( $n(\text{H}_2\text{O}_2) : n(\text{S}) = 2:1$ ; T = 60 °C); (C) Effects of the loading amount of SiW<sub>12</sub> on

the sulfur removal rate (0.03 g catalysts;  $n(\text{H}_2\text{O}_2) : n(\text{S}) = 2:1$ ; T = 60 °C)

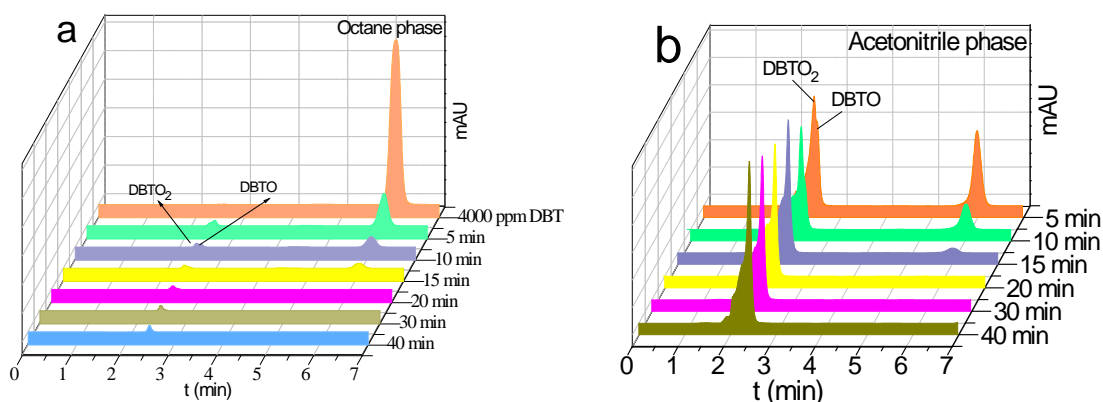

Fig. S6 HPLC chromatograms of (a) n-octane phases (b) and acetonitrile phases for ODS over  $\gamma$ -

Fe<sub>2</sub>O<sub>3</sub>@NC@SiW<sub>12</sub>-300 with H<sub>2</sub>O<sub>2</sub> as oxidant.

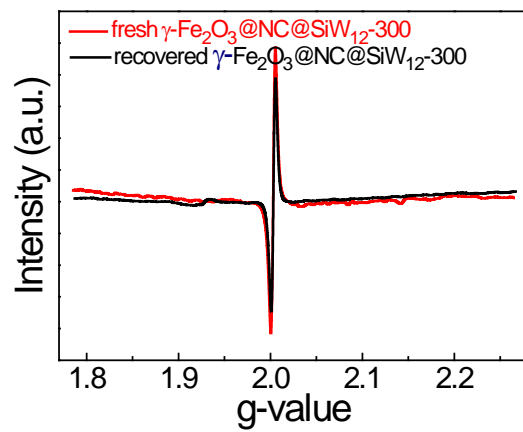

Fig. S7 EPR spectra of fresh and recovered  $\gamma\text{-Fe}_2\text{O}_3\text{@NC@SiW}_{12}\text{-300}$  catalyst
